# Supplementary material
Source: MDPI journal article supplement (https://www.mdpi.com/2073-4441/9/12/964)
Supplement: s1 [file s1]

## Supplementary Materials

Article

# Spanish Agriculture and Water: Educational implications of water culture and consumption from the farmers' perspective

Juan-Carlos Tójar-Hurtado \*, Esther Mena-Rodríguez and Miguel-Ángel Fernández-Jiménez

Department of Research Methods and Evaluation in Education, University of Malaga, ES-29071, Malaga, Spain; emena@uma.es (E.M.-R.); mafjimenez@uma.es (M.-A.F.-J.)

\* Correspondence: jctojar@uma.es (J.-C.T.-H.); Tel.: +34-952-132-543

**Table S1.** Results expressed in terms of a percent of the respondents of the questionnaire.

| Element                                                                                                                  | 5     | 4     | 3     | 2     | 1     | Me   | SD   | $\chi^2$ |
|--------------------------------------------------------------------------------------------------------------------------|-------|-------|-------|-------|-------|------|------|----------|
| 1. When it comes to consumption, the agricultural sector should have more say in political decisions on water management | 48.20 | 27.30 | 20.40 | 2.60  | 1.50  | 4.18 | 0.94 | 769.25   |
| 2. Water management would be better if the situation of farmers were considered                                          | 41.40 | 29.30 | 23.50 | 4.00  | 1.80  | 4.04 | 0.98 | 589.13   |
| 3. In agriculture, water is not wasted                                                                                   | 12.50 | 12.20 | 26.60 | 18.60 | 30.10 | 2.59 | 1.36 | 136.28   |
| 4. Efficiency in water consumption has advanced more in agriculture than in other sectors                                | 16.50 | 24.00 | 43.90 | 10.80 | 4.80  | 3.36 | 1.03 | 471.30   |
| 5. Water is not a problem for the general population, instead, it is a problem for farmers                               | 7.00  | 10.70 | 17.80 | 12.20 | 52.30 | 2.07 | 1.32 | 702.69   |
| 6. It is a pity that all this water is lost at the river mouth                                                           | 46.50 | 16.50 | 20.60 | 7.80  | 8.60  | 3.84 | 1.32 | 511.73   |
| 7. The water problem would be solved by transferring water from the surplus basins to the deficit ones                   | 26.80 | 23.30 | 35.20 | 8.40  | 6.30  | 3.56 | 1.15 | 314.37   |
| 8. If the infrastructure were improved, there would be a larger irrigated area                                           | 48.10 | 28.10 | 18.10 | 4.00  | 1.70  | 4.17 | 0.97 | 746.60   |
| 9. Watering more rainfed crops will increase efficiency                                                                  | 14.10 | 18.30 | 34.60 | 12.40 | 20.60 | 2.93 | 1.30 | 159.12   |
| 10. Using fertilisers above the recommended rates of application improves production                                     | 6.10  | 9.00  | 14.70 | 12.20 | 58.00 | 1.93 | 1.27 | 951.28   |
| 11. The choice of crops must be made taking into account the profitability                                               | 29.90 | 21.10 | 32.60 | 7.70  | 8.60  | 3.56 | 1.23 | 277.70   |
| 12. The water canon is already too                                                                                       | 26.40 | 21.70 | 36.80 | 9.70  | 5.40  | 3.54 | 1.14 | 332.35   |

high

|                                                                                                               |       |       |       |       |       |      |      |         |
|---------------------------------------------------------------------------------------------------------------|-------|-------|-------|-------|-------|------|------|---------|
| 13. I would not mind paying more for canon if I had more water                                                | 9.50  | 14.00 | 34.70 | 17.60 | 24.20 | 2.67 | 1.25 | 198.66  |
| 14. It is necessary to give more water to the crops that help to fix more people to the territory             | 22.90 | 24.70 | 36.60 | 8.30  | 7.50  | 3.47 | 1.15 | 308.59  |
| 15. A social criterion should be utilised for the distribution of water (crops that generate more employment) | 33.90 | 27.50 | 27.10 | 7.10  | 4.40  | 3.79 | 1.12 | 365.46  |
| 16. More water should be provided for irrigation to the larger cropland                                       | 18.40 | 23.80 | 31.10 | 13.60 | 13.10 | 3.21 | 1.26 | 117.82  |
| 17. Development and growth cannot slow down due to a lack of water                                            | 30.70 | 21.40 | 27.80 | 10.00 | 10.00 | 3.53 | 1.29 | 194.30  |
| 18. Fertilisers are responsible for soil and water pollution                                                  | 33.50 | 18.20 | 29.10 | 11.10 | 8.10  | 3.58 | 1.27 | 251.89  |
| 19. Improvements to infrastructure would allow for more irrigation                                            | 46.20 | 26.40 | 18.70 | 5.50  | 3.20  | 4.07 | 1.08 | 629.11  |
| 20. Investing in more efficient irrigation techniques would make it possible to endure times of drought       | 57.00 | 22.60 | 15.70 | 3.80  | 0.90  | 4.31 | 0.93 | 1041.07 |
| 21. Low quality or recaptured water, could be used for agriculture                                            | 44.40 | 26.10 | 18.70 | 6.40  | 4.40  | 3.99 | 1.31 | 547.23  |
| 22. The connection between basins is a solution against drought                                               |       |       |       |       |       |      |      |         |
| 23. The main use of water from rivers must be agriculture                                                     | 25.90 | 23.50 | 38.00 | 8.80  | 3.90  | 3.59 | 1.08 | 389.19  |
| 24. In relation to water, the administration often makes unjustified decisions                                | 18.20 | 23.90 | 35.80 | 12.60 | 9.50  | 3.29 | 1.18 | 223.05  |
| 25. The administration effectively communicates its decisions on irrigation prohibitions                      | 27.80 | 23.40 | 36.80 | 9.30  | 2.70  | 3.64 | 1.06 | 395.74  |
| 26. Other sectors, such as industry and tourism, manage water more poorly than agriculture                    | 31.20 | 24.20 | 27.30 | 10.30 | 7.00  | 3.62 | 1.21 | 236.62  |
| 27. Domestic water consumption conceals unjustified water costs                                               | 35.30 | 26.50 | 25.50 | 7.70  | 4.90  | 3.80 | 1.15 | 353.23  |
| 28. There are many non-farmers who use a lot of water to cultivate their plots of land                        | 42.40 | 23.70 | 22.50 | 7.20  | 4.20  | 3.93 | 1.15 | 481.62  |
| 29. Management should pay more attention to the opinion of farmers                                            | 39.80 | 30.20 | 22.50 | 4.90  | 2.60  | 3.99 | 1.03 | 532.05  |
| 30. Technological modernisation saves more water than advertising campaigns                                   | 42.80 | 25.90 | 24.10 | 4.90  | 2.30  | 4.02 | 1.03 | 597.64  |

---
